# Supplementary material
Source: PubMed Central journal article supplement (PMC4961168)
Supplement: pnas.1601070113.sd01.pdf [file pnas.1601070113.sd01.pdf]

**Supplementary Table 1.** MG-RAST ID numbers for metagenomic libraries included in this study along with habitat type, latitude and longitude, and number of annotated bacterial, archaeal and fungal sequences in the library.

| MGRAST id | Habitat     | Latitude    | Longitude    | Bacteria | Archaea | Fungi   |
|-----------|-------------|-------------|--------------|----------|---------|---------|
| 4449125   | Tundra      | 81.517      | -62.283      | 2391231  | 5094    | 347     |
| 4449126   | Tundra      | 81.517      | -62.283      | 349641   | 760     | 621     |
| 4450729   | Tundra      | 81.517      | -62.283      | 105999   | 675     | 255     |
| 4450731   | Tundra      | 81.517      | -62.283      | 447002   | 5495    | 2113    |
| 4450125   | Tundra      | 80.60906667 | 13.48425     | 95471    | 937     | 451     |
| 4450126   | Tundra      | 80.60906667 | 13.48425     | 99302    | 2195    | 308     |
| 4450127   | Tundra      | 80.60906667 | 13.48425     | 135603   | 3235    | 391     |
| 4450123   | Tundra      | 80.5925     | 13.61018333  | 105199   | 1426    | 386     |
| 4450124   | Tundra      | 80.5925     | 13.61018333  | 110450   | 1227    | 449     |
| 4443231   | Tundra      | 80.00048    | -85.83945    | 1199398  | 13177   | 3624    |
| 4443232   | Tundra      | 80.00048    | -85.83945    | 144324   | 858     | 324     |
| 4477874   | Tundra      | 68.633      | -149.583     | 4266090  | 68495   | 82691   |
| 4512413   | Tundra      | 68.3523     | 19.04743333  | 418081   | 37010   | 5077    |
| 4512414   | Tundra      | 68.3523     | 19.04743333  | 583667   | 47622   | 6648    |
| 4512415   | Tundra      | 68.3523     | 19.04743333  | 546152   | 41582   | 7153    |
| 4512416   | Tundra      | 68.3523     | 19.04743333  | 237167   | 11663   | 2095    |
| 4512417   | Tundra      | 68.3523     | 19.04743333  | 121312   | 6219    | 1126    |
| 4522025   | Cold Desert | 65.51456261 | -67.95843859 | 2491006  | 5809    | 5404    |
| 4522026   | Cold Desert | 65.51456261 | -67.95843859 | 2541609  | 6933    | 4802    |
| 4470253   | Tundra      | 64.677812   | -157.833252  | 12939203 | 269653  | 259159  |
| 4470255   | Tundra      | 64.677812   | -157.833252  | 16638392 | 290901  | 371855  |
| 4470378   | Tundra      | 64.677812   | -157.833252  | 28261909 | 496788  | 577210  |
| 4470382   | Tundra      | 64.677812   | -157.833252  | 27650120 | 570234  | 563615  |
| 4491237   | Tundra      | 64.677812   | -157.833252  | 11541050 | 98075   | 1350576 |
| 4491382   | Tundra      | 64.677812   | -157.833252  | 7854572  | 69176   | 921438  |
| 4527652   | Agriculture | 55.63469444 | 13.40616667  | 145138   | 699     | 726     |
| 4528934   | Agriculture | 55.63469444 | 13.40616667  | 79284    | 425     | 244     |
| 4529373   | Agriculture | 55.63469444 | 13.40616667  | 162947   | 915     | 796     |
| 4529786   | Agriculture | 55.63469444 | 13.40616667  | 143484   | 814     | 630     |
| 4547279   | Agriculture | 53.410222   | 69.025       | 1097940  | 843     | 949     |
| 4547281   | Agriculture | 53.410222   | 69.025       | 1359274  | 646     | 647     |
| 4547283   | Agriculture | 53.410222   | 69.025       | 1232348  | 840     | 727     |
| 4535147   | Wetland     | 52.3594201  | 13.3089427   | 1933210  | 4781    | 4538    |
| 4535148   | Wetland     | 52.3594201  | 13.3089427   | 2513696  | 7429    | 5946    |
| 4535149   | Wetland     | 52.3594201  | 13.3089427   | 659518   | 9568    | 1583    |
| 4535150   | Wetland     | 52.3594201  | 13.3089427   | 1166780  | 16163   | 2781    |
| 4535151   | Wetland     | 52.3594201  | 13.3089427   | 1347744  | 12392   | 3955    |
| 4535152   | Wetland     | 52.3594201  | 13.3089427   | 759409   | 7885    | 2553    |
| 4528623   | Agriculture | 52.19       | -1.61        | 136055   | 11704   | 3784    |
| 4528624   | Agriculture | 52.19       | -1.61        | 684465   | 32632   | 36719   |
| 4485389   | Grassland   | 51.97       | 5.64         | 91240    | 1269    | 1044    |
| 4485390   | Grassland   | 51.97       | 5.64         | 109452   | 1388    | 1383    |
| 4485391   | Grassland   | 51.97       | 5.64         | 133243   | 1575    | 1016    |

|         |                  |             |             |          |        |        |
|---------|------------------|-------------|-------------|----------|--------|--------|
| 4485392 | Grassland        | 51.97       | 5.64        | 110524   | 1247   | 1143   |
| 4485393 | Grassland        | 51.97       | 5.64        | 97886    | 1148   | 751    |
| 4485394 | Grassland        | 51.97       | 5.64        | 78658    | 904    | 1404   |
| 4485395 | Grassland        | 51.97       | 5.64        | 75061    | 776    | 1091   |
| 4485396 | Grassland        | 51.97       | 5.64        | 77009    | 818    | 1399   |
| 4485397 | Grassland        | 51.97       | 5.64        | 76677    | 719    | 1198   |
| 4485398 | Grassland        | 51.97       | 5.64        | 73739    | 717    | 1257   |
| 4485399 | Grassland        | 51.97       | 5.64        | 91457    | 832    | 1317   |
| 4485400 | Grassland        | 51.97       | 5.64        | 119861   | 1292   | 2212   |
| 4485401 | Grassland        | 51.97       | 5.64        | 129648   | 1881   | 2058   |
| 4485402 | Grassland        | 51.97       | 5.64        | 107563   | 1020   | 1976   |
| 4485403 | Grassland        | 51.97       | 5.64        | 117147   | 1390   | 1344   |
| 4537190 | Grassland        | 51.481481   | 0.222231    | 587936   | 4115   | 1937   |
| 4537191 | Grassland        | 51.481481   | 0.222231    | 457757   | 2901   | 1652   |
| 4453246 | Grassland        | 51.481481   | 0.222231    | 883372   | 9458   | 8426   |
| 4453247 | Grassland        | 51.481481   | 0.222231    | 1211836  | 12594  | 6652   |
| 4453254 | Grassland        | 51.481481   | 0.222231    | 915134   | 9091   | 5342   |
| 4453256 | Grassland        | 51.481481   | 0.222231    | 1180824  | 12785  | 9576   |
| 4453257 | Grassland        | 51.481481   | 0.222231    | 940272   | 10832  | 6827   |
| 4453261 | Grassland        | 51.481481   | 0.222231    | 1137611  | 12857  | 13010  |
| 4453274 | Grassland        | 51.481481   | 0.222231    | 2247699  | 26200  | 11494  |
| 4453406 | Grassland        | 51.481481   | 0.222231    | 891913   | 9789   | 5959   |
| 4453407 | Grassland        | 51.481481   | 0.222231    | 804763   | 9101   | 4565   |
| 4554763 | Pasture          | 51.04477    | -2.111945   | 1080884  | 7474   | 3384   |
| 4554764 | Pasture          | 51.04477    | -2.111945   | 356325   | 2551   | 1271   |
| 4554765 | Pasture          | 51.04477    | -2.111945   | 499518   | 3534   | 1734   |
| 4554769 | Pasture          | 51.04477    | -2.111945   | 186744   | 1426   | 670    |
| 4554770 | Pasture          | 51.04477    | -2.111945   | 712744   | 4981   | 2003   |
| 4554771 | Pasture          | 51.04477    | -2.111945   | 470682   | 3408   | 1416   |
| 4544233 | Temperate Forest | 49.04376472 | 13.61713806 | 2567943  | 22225  | 445098 |
| 4538778 | Temperate Forest | 47.5061     | -93.45278   | 16052312 | 101426 | 193727 |
| 4538779 | Temperate Forest | 47.5061     | -93.45278   | 27034748 | 571416 | 65758  |
| 4623639 | Grassland        | 46.682      | -114.027    | 2628253  | 28428  | 10334  |
| 4623640 | Grassland        | 46.682      | -114.027    | 2920104  | 30141  | 15699  |
| 4623641 | Grassland        | 46.682      | -114.027    | 3593283  | 32632  | 12066  |
| 4623642 | Grassland        | 46.682      | -114.027    | 3791514  | 42106  | 14804  |
| 4539063 | Grassland        | 45.4026492  | -93.2020664 | 30314072 | 319072 | 95967  |
| 4539064 | Grassland        | 45.4026492  | -93.2020664 | 31079400 | 240814 | 261369 |
| 4541641 | Grassland        | 45.4026492  | -93.2020664 | 30870842 | 256894 | 189241 |
| 4541642 | Grassland        | 45.4026492  | -93.2020664 | 34181981 | 336612 | 156878 |
| 4541644 | Grassland        | 45.4026492  | -93.2020664 | 28318560 | 260602 | 128857 |
| 4541647 | Grassland        | 45.4026492  | -93.2020664 | 38864434 | 343194 | 309519 |
| 4541648 | Grassland        | 45.4026492  | -93.2020664 | 29317966 | 222077 | 341736 |
| 4541649 | Grassland        | 45.4026492  | -93.2020664 | 34582339 | 247113 | 172011 |
| 4541651 | Grassland        | 45.4026492  | -93.2020664 | 34255376 | 235807 | 194585 |
| 4449249 | Grassland        | 45.39926    | -93.26529   | 28087    | 284    | 257    |
| 4449252 | Grassland        | 45.39926    | -93.26529   | 74805    | 610    | 635    |
| 4449255 | Grassland        | 45.39926    | -93.26529   | 62765    | 703    | 392    |
| 4449256 | Grassland        | 45.39926    | -93.26529   | 71545    | 767    | 351    |

|         |                  |            |             |          |        |         |
|---------|------------------|------------|-------------|----------|--------|---------|
| 4449258 | Grassland        | 45.39926   | -93.26529   | 30676    | 280    | 319     |
| 4449284 | Grassland        | 45.39926   | -93.26529   | 320102   | 2249   | 1816    |
| 4449357 | Grassland        | 45.39926   | -93.26529   | 237587   | 2579   | 903     |
| 4449877 | Grassland        | 45.39926   | -93.26529   | 66938    | 755    | 326     |
| 4539662 | Temperate Forest | 44.315619  | -85.602128  | 833847   | 7278   | 798219  |
| 4539663 | Temperate Forest | 44.315619  | -85.602128  | 1306388  | 4663   | 657843  |
| 4539664 | Temperate Forest | 44.315619  | -85.602128  | 1459490  | 9090   | 753131  |
| 4539665 | Temperate Forest | 44.315619  | -85.602128  | 321161   | 433    | 308720  |
| 4539666 | Temperate Forest | 44.315619  | -85.602128  | 764793   | 1788   | 563774  |
| 4539667 | Temperate Forest | 44.315619  | -85.602128  | 966878   | 3633   | 806429  |
| 4539668 | Temperate Forest | 44.315619  | -85.602128  | 1542109  | 19417  | 1142223 |
| 4539670 | Temperate Forest | 44.315619  | -85.602128  | 1201455  | 12505  | 1006966 |
| 4539671 | Temperate Forest | 44.315619  | -85.602128  | 1108826  | 5481   | 939733  |
| 4539672 | Temperate Forest | 44.315619  | -85.602128  | 509315   | 1360   | 497242  |
| 4539673 | Temperate Forest | 44.315619  | -85.602128  | 449128   | 1197   | 129849  |
| 4510860 | Grassland        | 43.15      | 2.55        | 259814   | 3111   | 16426   |
| 4510861 | Grassland        | 43.15      | 2.55        | 409770   | 1418   | 20368   |
| 4510862 | Grassland        | 43.15      | 2.55        | 394870   | 4171   | 23648   |
| 4510863 | Grassland        | 43.15      | 2.55        | 485108   | 8033   | 15840   |
| 4510864 | Grassland        | 43.15      | 2.55        | 397251   | 4668   | 24460   |
| 4510865 | Grassland        | 43.15      | 2.55        | 2052395  | 32125  | 37830   |
| 4510866 | Grassland        | 43.15      | 2.55        | 776824   | 12917  | 11021   |
| 4510867 | Grassland        | 43.15      | 2.55        | 2233683  | 34047  | 23251   |
| 4510868 | Grassland        | 43.15      | 2.55        | 91749    | 1703   | 3999    |
| 4465943 | Grassland        | 42.599444  | -85.366667  | 638670   | 4587   | 10617   |
| 4465947 | Grassland        | 42.599444  | -85.366667  | 802930   | 13721  | 3971    |
| 4465942 | Grassland        | 42.582778  | -85.366667  | 369931   | 7711   | 14436   |
| 4636837 | Agriculture      | 42.4439614 | -76.5018807 | 1212518  | 13385  | 3531    |
| 4637195 | Agriculture      | 42.4439614 | -76.5018807 | 1177045  | 14180  | 3583    |
| 4637196 | Agriculture      | 42.4439614 | -76.5018807 | 986560   | 11447  | 3102    |
| 4637197 | Agriculture      | 42.4439614 | -76.5018807 | 1100956  | 15036  | 3458    |
| 4449356 | Grassland        | 42.44158   | -85.37609   | 162036   | 1878   | 711     |
| 4449358 | Grassland        | 42.44158   | -85.37609   | 295317   | 3778   | 1284    |
| 4449359 | Grassland        | 42.44158   | -85.37609   | 215666   | 2500   | 950     |
| 4449360 | Grassland        | 42.44158   | -85.37609   | 282878   | 3254   | 1037    |
| 4449362 | Grassland        | 42.44158   | -85.37609   | 308771   | 2744   | 1472    |
| 4449363 | Grassland        | 42.44158   | -85.37609   | 47952    | 620    | 285     |
| 4449364 | Grassland        | 42.44158   | -85.37609   | 47167    | 533    | 257     |
| 4509396 | Agriculture      | 42.01375   | -93.783837  | 11387365 | 296823 | 197100  |
| 4509397 | Agriculture      | 42.01375   | -93.783837  | 25486805 | 470723 | 362178  |
| 4509398 | Agriculture      | 42.01375   | -93.783837  | 33688407 | 654611 | 509163  |
| 4539571 | Grassland        | 41.827222  | -93.008611  | 42814057 | 312498 | 620996  |
| 4539572 | Grassland        | 41.827222  | -93.008611  | 42418491 | 331201 | 587842  |
| 4539573 | Grassland        | 41.827222  | -93.008611  | 42474804 | 321161 | 621054  |
| 4539574 | Grassland        | 41.827222  | -93.008611  | 42209330 | 319816 | 566401  |
| 4539575 | Grassland        | 41.827222  | -93.008611  | 48454133 | 355128 | 645998  |
| 4539576 | Grassland        | 41.827222  | -93.008611  | 42732197 | 321879 | 688758  |
| 4539577 | Grassland        | 41.827222  | -93.008611  | 43617244 | 326343 | 620914  |
| 4539578 | Grassland        | 41.827222  | -93.008611  | 11845762 | 92734  | 265952  |

|         |                  |            |             |          |          |        |
|---------|------------------|------------|-------------|----------|----------|--------|
| 4539579 | Grassland        | 41.827222  | -93.008611  | 11588160 | 95866    | 289336 |
| 4539580 | Grassland        | 41.827222  | -93.008611  | 13713576 | 101701   | 281905 |
| 4539581 | Grassland        | 41.827222  | -93.008611  | 11581005 | 91937    | 268270 |
| 4539582 | Grassland        | 41.827222  | -93.008611  | 10498734 | 81939    | 263029 |
| 4539583 | Grassland        | 41.827222  | -93.008611  | 12513906 | 92942    | 284683 |
| 4539584 | Grassland        | 41.827222  | -93.008611  | 12226152 | 93644    | 272634 |
| 4539586 | Grassland        | 41.827222  | -93.008611  | 4803588  | 27313    | 76369  |
| 4539587 | Grassland        | 41.827222  | -93.008611  | 4275248  | 24302    | 75991  |
| 4539588 | Grassland        | 41.827222  | -93.008611  | 4450923  | 25332    | 7128   |
| 4539589 | Grassland        | 41.827222  | -93.008611  | 4728221  | 25922    | 80446  |
| 4539590 | Grassland        | 41.827222  | -93.008611  | 4567358  | 25654    | 76273  |
| 4539591 | Grassland        | 41.827222  | -93.008611  | 4794956  | 26312    | 6921   |
| 4539592 | Grassland        | 41.827222  | -93.008611  | 13562372 | 104270   | 143178 |
| 4539593 | Grassland        | 41.827222  | -93.008611  | 10194694 | 10194694 | 138433 |
| 4539594 | Grassland        | 41.827222  | -93.008611  | 10847864 | 80256    | 147953 |
| 4539514 | Agriculture      | 41.771111  | -92.961667  | 17694468 | 168596   | 44547  |
| 4539515 | Agriculture      | 41.771111  | -92.961667  | 20721022 | 186048   | 52536  |
| 4539516 | Agriculture      | 41.771111  | -92.961667  | 19550972 | 183302   | 49156  |
| 4539517 | Agriculture      | 41.771111  | -92.961667  | 20345914 | 189439   | 48962  |
| 4539518 | Agriculture      | 41.771111  | -92.961667  | 10104194 | 89835    | 25798  |
| 4539519 | Agriculture      | 41.771111  | -92.961667  | 18926775 | 173363   | 48975  |
| 4539520 | Agriculture      | 41.771111  | -92.961667  | 20941502 | 201219   | 50682  |
| 4539521 | Agriculture      | 41.771111  | -92.961667  | 13997342 | 133315   | 35405  |
| 4539522 | Agriculture      | 41.771111  | -92.961667  | 19413382 | 147061   | 45729  |
| 4539523 | Agriculture      | 41.771111  | -92.961667  | 19832828 | 194480   | 50707  |
| 4539524 | Agriculture      | 41.771111  | -92.961667  | 19436158 | 185264   | 49532  |
| 4539525 | Agriculture      | 41.771111  | -92.961667  | 18260846 | 174969   | 46429  |
| 4539526 | Agriculture      | 41.771111  | -92.961667  | 18661071 | 181533   | 48748  |
| 4539527 | Agriculture      | 41.771111  | -92.961667  | 17740940 | 172644   | 47922  |
| 4539528 | Agriculture      | 41.771111  | -92.961667  | 57209520 | 408229   | 134867 |
| 4508939 | Agriculture      | 39.812644  | -84.910717  | 7334405  | 99997    | 39417  |
| 4508940 | Agriculture      | 39.801142  | -84.92135   | 10494734 | 123554   | 53373  |
| 4508942 | Temperate Forest | 39.795592  | -84.922042  | 13642022 | 214908   | 67118  |
| 4508938 | Agriculture      | 39.773786  | -84.816108  | 5037137  | 65653    | 32878  |
| 4508937 | Agriculture      | 39.765383  | -84.847958  | 4508937  | 371955   | 162719 |
| 4508941 | Temperate Forest | 39.750944  | -84.918778  | 6247099  | 66403    | 32143  |
| 4477804 | Grassland        | 39.1       | -96.6       | 4014837  | 67258    | 75860  |
| 4492614 | Desert           | 38.674764  | -109.832948 | 17033523 | 247735   | 186554 |
| 4492618 | Desert           | 38.674764  | -109.832948 | 9881541  | 128516   | 123940 |
| 4492602 | Desert           | 38.63044   | -109.615861 | 5247807  | 59317    | 45716  |
| 4492603 | Desert           | 38.63044   | -109.615861 | 6365865  | 74137    | 64067  |
| 4492761 | Desert           | 38.460335  | -109.824501 | 14713975 | 180262   | 147395 |
| 4569530 | Temperate Forest | 37.5034138 | 126.7660309 | 8830047  | 24362    | 11343  |
| 4569531 | Temperate Forest | 37.5034138 | 126.7660309 | 10005299 | 13877    | 22654  |
| 4569532 | Temperate Forest | 37.5034138 | 126.7660309 | 9841530  | 12650    | 8108   |
| 4569533 | Temperate Forest | 37.5034138 | 126.7660309 | 9135088  | 9856     | 10877  |
| 4569534 | Temperate Forest | 37.5034138 | 126.7660309 | 10623883 | 11330    | 7875   |
| 4583655 | Temperate Forest | 37.22619   | -80.42829   | 1132619  | 4685     | 3392   |
| 4465556 | Temperate Forest | 36.96971   | -3.46027    | 341312   | 2851     | 10918  |

|         |                  |           |             |          |        |         |
|---------|------------------|-----------|-------------|----------|--------|---------|
| 4465558 | Temperate Forest | 36.95744  | -3.46336    | 215801   | 1886   | 5020    |
| 4477899 | Temperate Forest | 35.967    | -79.083     | 2956584  | 41934  | 62275   |
| 4477872 | Desert           | 35.383    | -105.933    | 4980010  | 112256 | 100042  |
| 4573678 | Lawn             | 35.20618  | -97.442553  | 5371772  | 23134  | 39926   |
| 4573679 | Lawn             | 35.20618  | -97.442553  | 4491109  | 20138  | 33014   |
| 4573680 | Lawn             | 35.195018 | -97.441915  | 3341704  | 51699  | 9316    |
| 4573681 | Lawn             | 35.195018 | -97.441915  | 2031591  | 34103  | 5689    |
| 4573682 | Lawn             | 35.189511 | -97.448695  | 3205426  | 50290  | 9069    |
| 4573683 | Lawn             | 35.189511 | -97.448695  | 2655461  | 42915  | 7624    |
| 4477805 | Desert           | 34.9      | -115.65     | 4567758  | 96585  | 92690   |
| 4477877 | Temperate Forest | 34.617    | -81.667     | 4659385  | 65963  | 97334   |
| 4477873 | Desert           | 34.333    | -106.733    | 8801678  | 191603 | 167520  |
| 4511111 | Grassland        | 33.739556 | -117.703419 | 6230798  | 35616  | 1524980 |
| 4511112 | Grassland        | 33.739556 | -117.703419 | 6743210  | 47065  | 4594110 |
| 4511113 | Grassland        | 33.739556 | -117.703419 | 6075571  | 43080  | 3328469 |
| 4511114 | Grassland        | 33.739556 | -117.703419 | 9918425  | 60584  | 2442547 |
| 4511115 | Grassland        | 33.739556 | -117.703419 | 29984961 | 193522 | 4978316 |
| 4511116 | Grassland        | 33.739556 | -117.703419 | 960490   | 6704   | 229728  |
| 4511178 | Grassland        | 33.739556 | -117.703419 | 4644853  | 34236  | 3747896 |
| 4511179 | Grassland        | 33.739556 | -117.703419 | 8200792  | 53814  | 4460028 |
| 4511180 | Grassland        | 33.739556 | -117.703419 | 8614083  | 51348  | 3315141 |
| 4511181 | Grassland        | 33.739556 | -117.703419 | 1758489  | 11501  | 732092  |
| 4511182 | Grassland        | 33.739556 | -117.703419 | 5166376  | 46766  | 5144937 |
| 4511183 | Grassland        | 33.739556 | -117.703419 | 10165255 | 69535  | 6513714 |
| 4511185 | Grassland        | 33.739556 | -117.703419 | 4953547  | 30197  | 1466301 |
| 4654032 | Temperate Forest | 33        | 35.233333   | 2595553  | 23782  | 4773    |
| 4654021 | Temperate Forest | 33        | 35.233333   | 6566531  | 62083  | 33217   |
| 4654022 | Temperate Forest | 33        | 35.233333   | 2996487  | 27377  | 15321   |
| 4631721 | Agriculture      | 32.778609 | 35.023668   | 5533124  | 64728  | 17428   |
| 4631724 | Agriculture      | 32.778609 | 35.023668   | 5405189  | 75737  | 18543   |
| 4654023 | Grassland        | 31.7      | 35.05       | 2431133  | 25440  | 8901    |
| 4654024 | Grassland        | 31.7      | 35.05       | 3251695  | 41900  | 9444    |
| 4654025 | Grassland        | 31.7      | 35.05       | 2342360  | 27686  | 7504    |
| 4523238 | Agriculture      | 31.653584 | 120.752507  | 15458326 | 392031 | 226396  |
| 4523239 | Agriculture      | 31.653584 | 120.752507  | 1934227  | 30702  | 29251   |
| 4523240 | Agriculture      | 31.653584 | 120.752507  | 12063424 | 303688 | 182196  |
| 4654026 | Desert           | 31.033333 | 34.9        | 3146139  | 31459  | 11560   |
| 4654027 | Desert           | 31.033333 | 34.9        | 1787466  | 18403  | 5582    |
| 4654028 | Desert           | 31.033333 | 34.9        | 1932453  | 21504  | 6409    |
| 4654029 | Desert           | 30.866667 | 34.766667   | 1686799  | 25743  | 4903    |
| 4654030 | Desert           | 30.866667 | 34.766667   | 1790997  | 23682  | 5588    |
| 4654031 | Desert           | 30.866667 | 34.766667   | 1612002  | 23113  | 11293   |
| 4543020 | Desert           | 23.941333 | 70.188389   | 498226   | 264275 | 1555    |
| 4543022 | Desert           | 23.940972 | 70.188444   | 409697   | 223311 | 1182    |
| 4543023 | Desert           | 23.940444 | 70.187889   | 588718   | 144336 | 1793    |
| 4543019 | Desert           | 23.908056 | 70.537806   | 138977   | 100434 | 596     |
| 4543021 | Desert           | 23.834889 | 69.518917   | 109996   | 36556  | 633     |
| 4514245 | Desert           | 23.8109   | 70.98319983 | 1304627  | 141141 | 10485   |
| 4514299 | Desert           | 23.7925   | 71.008      | 994556   | 94861  | 13269   |

|         |                 |             |             |          |        |         |
|---------|-----------------|-------------|-------------|----------|--------|---------|
| 4667212 | Agriculture     | 23.579592   | 47.586947   | 4667609  | 21735  | 11136   |
| 4667213 | Agriculture     | 23.579592   | 47.586947   | 7248183  | 85261  | 27727   |
| 4667214 | Agriculture     | 23.579592   | 47.586947   | 7072687  | 32519  | 31423   |
| 4667215 | Agriculture     | 23.579592   | 47.586947   | 9383436  | 122798 | 29868   |
| 4635904 | Agriculture     | 22.11       | 112.77      | 13740313 | 138838 | 37679   |
| 4635905 | Agriculture     | 22.11       | 112.77      | 12336708 | 126185 | 39782   |
| 4626743 | Agriculture     | 21.088732   | 105.733872  | 14640101 | 386682 | 45226   |
| 4626744 | Agriculture     | 21.088732   | 105.733872  | 14578750 | 397085 | 45169   |
| 4626747 | Agriculture     | 21.088395   | 105.727361  | 15117374 | 345379 | 47850   |
| 4626748 | Agriculture     | 21.088395   | 105.727361  | 14865329 | 347424 | 46653   |
| 4626751 | Agriculture     | 21.088395   | 105.727361  | 1345800  | 39627  | 3573    |
| 4626755 | Agriculture     | 21.088395   | 105.727361  | 4199704  | 106087 | 10648   |
| 4626756 | Agriculture     | 21.088395   | 105.727361  | 3650601  | 93986  | 9702    |
| 4626745 | Agriculture     | 21.08839    | 105.727278  | 17195644 | 479664 | 48249   |
| 4626746 | Agriculture     | 21.08839    | 105.727278  | 17757430 | 448591 | 51478   |
| 4626750 | Agriculture     | 21.08839    | 105.727278  | 1192248  | 37685  | 3004    |
| 4626753 | Agriculture     | 21.08839    | 105.727278  | 3642503  | 103140 | 8461    |
| 4626754 | Agriculture     | 21.08839    | 105.727278  | 3175680  | 87838  | 7103    |
| 4623913 | Agriculture     | 19.2        | 73.8        | 164358   | 3479   | 911     |
| 4446153 | Tropical Forest | 18.3        | -65.833     | 634309   | 7993   | 3385    |
| 4480704 | Desert          | 15.446105   | 18.7350005  | 46476282 | 759090 | 1074136 |
| 4582244 | Tropical Forest | 5.095745008 | 117.6298264 | 1985640  | 20562  | 6349    |
| 4582245 | Tropical Forest | 5.095745008 | 117.6298264 | 1843955  | 19057  | 6117    |
| 4582792 | Tropical Forest | 5.095745008 | 117.6298264 | 2727218  | 28509  | 8267    |
| 4582246 | Tropical Forest | 5.095174368 | 117.6455434 | 2449150  | 20287  | 10119   |
| 4582247 | Tropical Forest | 5.095174368 | 117.6455434 | 2293434  | 19861  | 9449    |
| 4582793 | Tropical Forest | 5.095174368 | 117.6455434 | 3295464  | 28364  | 12514   |
| 4582243 | Tropical Forest | 5.093159778 | 117.6361055 | 2014696  | 26490  | 5976    |
| 4582791 | Tropical Forest | 5.093159778 | 117.6361055 | 2969571  | 38589  | 8830    |
| 4582799 | Tropical Forest | 5.089786146 | 117.6805294 | 2817190  | 23401  | 16081   |
| 4582262 | Tropical Forest | 5.084836129 | 117.7082288 | 3005441  | 30641  | 14086   |
| 4582263 | Tropical Forest | 5.084836129 | 117.7082288 | 2835190  | 28259  | 14990   |
| 4582801 | Tropical Forest | 5.084836129 | 117.7082288 | 3932168  | 41923  | 20634   |
| 4582802 | Tropical Forest | 5.083723264 | 117.7760496 | 3635988  | 51182  | 20268   |
| 4582267 | Tropical Forest | 5.079992227 | 117.7834393 | 2235588  | 22523  | 9495    |
| 4582803 | Tropical Forest | 5.079992227 | 117.7834393 | 3199249  | 33687  | 13498   |
| 4582261 | Tropical Forest | 5.07986499  | 117.7061044 | 1961564  | 20719  | 6751    |
| 4582800 | Tropical Forest | 5.07986499  | 117.7061044 | 2880748  | 32045  | 10110   |
| 4582798 | Tropical Forest | 5.028118808 | 117.7873337 | 2882008  | 30270  | 15341   |
| 4582254 | Tropical Forest | 5.021559382 | 117.790187  | 4582254  | 16027  | 6293    |
| 4582797 | Tropical Forest | 5.021559382 | 117.790187  | 2352758  | 24027  | 8091    |
| 4582248 | Tropical Forest | 5.02092395  | 117.7522466 | 1948268  | 17759  | 8099    |
| 4582249 | Tropical Forest | 5.02092395  | 117.7522466 | 1789789  | 15874  | 8201    |
| 4582794 | Tropical Forest | 5.02092395  | 117.7522466 | 2581551  | 23846  | 11538   |
| 4582250 | Tropical Forest | 4.985542931 | 117.860351  | 2300888  | 17809  | 14154   |
| 4582251 | Tropical Forest | 4.985542931 | 117.860351  | 2210316  | 16464  | 13339   |
| 4582795 | Tropical Forest | 4.985542931 | 117.860351  | 3140009  | 23756  | 18233   |
| 4582236 | Tropical Forest | 4.97135547  | 117.7860897 | 2298485  | 19165  | 10566   |
| 4582237 | Tropical Forest | 4.97135547  | 117.7860897 | 2178118  | 17173  | 10107   |

|         |                 |              |              |          |        |        |
|---------|-----------------|--------------|--------------|----------|--------|--------|
| 4582788 | Tropical Forest | 4.97135547   | 117.7860897  | 3024239  | 26745  | 12075  |
| 4582238 | Tropical Forest | 4.97051904   | 117.8158884  | 2387705  | 21225  | 12322  |
| 4582789 | Tropical Forest | 4.97051904   | 117.8158884  | 3229573  | 29160  | 15928  |
| 4582230 | Tropical Forest | 4.964953959  | 117.8211249  | 2053839  | 18346  | 9442   |
| 4582231 | Tropical Forest | 4.964953959  | 117.8211249  | 1957144  | 17327  | 9204   |
| 4582785 | Tropical Forest | 4.964953959  | 117.8211249  | 2778709  | 25006  | 14213  |
| 4582234 | Tropical Forest | 4.959089728  | 117.8039624  | 2364880  | 20588  | 10908  |
| 4582235 | Tropical Forest | 4.959089728  | 117.8039624  | 2238198  | 19736  | 9526   |
| 4582787 | Tropical Forest | 4.959089728  | 117.8039624  | 3218725  | 28394  | 15078  |
| 4582232 | Tropical Forest | 4.949803418  | 117.8071043  | 2193860  | 23536  | 12805  |
| 4582233 | Tropical Forest | 4.949803418  | 117.8071043  | 2066910  | 21332  | 11933  |
| 4582786 | Tropical Forest | 4.949803418  | 117.8071043  | 2912463  | 30457  | 16815  |
| 4582276 | Tropical Forest | 4.937170884  | 117.9466655  | 2364741  | 19025  | 18918  |
| 4582277 | Tropical Forest | 4.937170884  | 117.9466655  | 2210883  | 17416  | 19183  |
| 4582808 | Tropical Forest | 4.937170884  | 117.9466655  | 3234841  | 26356  | 26732  |
| 4582252 | Tropical Forest | 4.933404056  | 117.9811189  | 2488708  | 22708  | 8704   |
| 4582253 | Tropical Forest | 4.933404056  | 117.9811189  | 2335285  | 21500  | 8274   |
| 4582796 | Tropical Forest | 4.933404056  | 117.9811189  | 3341671  | 31928  | 11535  |
| 4582790 | Tropical Forest | 4.92604374   | 117.9490451  | 2764751  | 33209  | 9377   |
| 4582274 | Tropical Forest | 4.497937281  | 117.7273913  | 2400687  | 26037  | 9719   |
| 4582275 | Tropical Forest | 4.497937281  | 117.7273913  | 2255031  | 22475  | 9202   |
| 4582807 | Tropical Forest | 4.497937281  | 117.7273913  | 3142815  | 35207  | 12989  |
| 4582270 | Tropical Forest | 4.497835692  | 117.7805929  | 2257726  | 24734  | 9347   |
| 4582805 | Tropical Forest | 4.497835692  | 117.7805929  | 2984071  | 33502  | 12273  |
| 4582268 | Tropical Forest | 4.492151421  | 117.7733772  | 2596163  | 27124  | 9781   |
| 4582804 | Tropical Forest | 4.492151421  | 117.7733772  | 3393887  | 36012  | 13127  |
| 4582272 | Tropical Forest | 4.490183182  | 117.7236977  | 3083738  | 31261  | 51887  |
| 4582273 | Tropical Forest | 4.490183182  | 117.7236977  | 2888111  | 30685  | 47901  |
| 4582806 | Tropical Forest | 4.490183182  | 117.7236977  | 4068970  | 41853  | 65870  |
| 4597435 | Agriculture     | -4.5585849   | 105.4068079  | 689045   | 5612   | 2712   |
| 4597438 | Agriculture     | -4.5585849   | 105.4068079  | 665696   | 6400   | 2324   |
| 4597440 | Agriculture     | -4.5585849   | 105.4068079  | 812346   | 6886   | 2932   |
| 4597442 | Agriculture     | -4.5585849   | 105.4068079  | 534760   | 4701   | 1802   |
| 4597444 | Agriculture     | -4.5585849   | 105.4068079  | 492674   | 4419   | 1975   |
| 4597445 | Agriculture     | -4.5585849   | 105.4068079  | 553406   | 5572   | 2141   |
| 4597446 | Agriculture     | -4.5585849   | 105.4068079  | 466307   | 4377   | 2293   |
| 4597447 | Agriculture     | -4.5585849   | 105.4068079  | 495822   | 6440   | 1665   |
| 4597449 | Agriculture     | -4.5585849   | 105.4068079  | 752836   | 7206   | 2486   |
| 4487567 | Tropical Forest | -6.712277778 | -38.25227778 | 109901   | 1435   | 2264   |
| 4487344 | Tropical Forest | -8.833777778 | -42.55369444 | 300018   | 3271   | 3204   |
| 4487345 | Tropical Forest | -9.223555556 | -41.0865     | 241975   | 3233   | 2781   |
| 4487345 | Tropical Forest | -9.223555556 | -41.0865     | 241975   | 3232   | 2781   |
| 4497403 | Tropical Forest | -11.6821758  | -55.008936   | 6013334  | 112640 | 111815 |
| 4497404 | Tropical Forest | -11.6821758  | -55.008936   | 10483498 | 208042 | 188072 |
| 4497401 | Tropical Forest | -11.6823977  | -55.8351277  | 7193835  | 119589 | 155980 |
| 4497402 | Tropical Forest | -11.6823977  | -55.8351277  | 8987629  | 142914 | 178541 |
| 4497370 | Agriculture     | -11.6832502  | -55.8357663  | 9412450  | 163764 | 164749 |
| 4497371 | Agriculture     | -11.6832502  | -55.8357663  | 10163451 | 184780 | 171510 |
| 4497372 | Pasture         | -11.7145028  | -55.7930737  | 9368917  | 160377 | 210252 |

|         |                 |             |             |          |        |        |
|---------|-----------------|-------------|-------------|----------|--------|--------|
| 4497373 | Pasture         | -11.7145028 | -55.7930737 | 11230682 | 213762 | 247863 |
| 4497387 | Agriculture     | -11.7412664 | -56.2533385 | 10298036 | 197467 | 208552 |
| 4497388 | Agriculture     | -11.7412664 | -56.2533385 | 8009946  | 135102 | 154762 |
| 4497385 | Tropical Forest | -11.7415612 | -56.2623677 | 11205951 | 171378 | 227769 |
| 4497386 | Tropical Forest | -11.7415612 | -56.2623677 | 8995923  | 140307 | 175326 |
| 4477807 | Tropical Forest | -12.633     | -71.233     | 6273498  | 113640 | 127416 |
| 4578924 | Grassland       | -15.6094    | 47.7433     | 3246234  | 24092  | 17399  |
| 4578925 | Grassland       | -15.6094    | 47.7433     | 3797508  | 28318  | 17698  |
| 4578926 | Grassland       | -15.6094    | 47.7433     | 4713482  | 55397  | 16482  |
| 4578927 | Grassland       | -15.6094    | 47.7433     | 3572116  | 40975  | 10613  |
| 4451033 | Wetland         | -23.89694   | -46.20778   | 754056   | 19386  | 2189   |
| 4451034 | Wetland         | -23.90167   | -45.25083   | 131660   | 5025   | 597    |
| 4450243 | Tropical Forest | -23.9039444 | -46.42975   | 515583   | 7724   | 2786   |
| 4451036 | Wetland         | -25.08389   | -47.95056   | 117159   | 4368   | 464    |
| 4451035 | Wetland         | -25.08389   | -45.25083   | 133636   | 3625   | 969    |
| 4477875 | Tropical Forest | -26.733     | -54.683     | 3717962  | 83964  | 79447  |
| 4533948 | Lawn            | -35.029006  | 138.571508  | 305596   | 2636   | 4086   |
| 4533949 | Lawn            | -35.029006  | 138.571508  | 338415   | 1709   | 12688  |
| 4533950 | Lawn            | -35.029006  | 138.571508  | 302982   | 3875   | 2322   |
| 4543715 | Lawn            | -35.029006  | 138.571508  | 237565   | 1713   | 34964  |
| 4543716 | Lawn            | -35.029006  | 138.571508  | 117020   | 1428   | 5353   |
| 4543717 | Lawn            | -35.029006  | 138.571508  | 104984   | 2103   | 3043   |
| 4477904 | Cold Desert     | -77.527     | 161.702     | 8684100  | 150115 | 153758 |
| 4477902 | Cold Desert     | -77.608     | 163.249     | 7532607  | 146526 | 143805 |
| 4477903 | Cold Desert     | -77.6375    | 162.887     | 5265558  | 104103 | 100810 |
| 4477803 | Cold Desert     | -77.725     | 162.311     | 4481345  | 53315  | 75701  |
| 4477901 | Cold Desert     | -77.725     | 162.313     | 4389964  | 68933  | 67760  |
| 4477900 | Cold Desert     | -78.03      | 163.8732833 | 5039023  | 106416 | 108314 |

---
